# Supplementary material
Source: PubMed Central journal article supplement (PMC7682420)
Supplement: pnas.2007236117.sapp.pdf [file pnas.2007236117.sapp.pdf]

Supplementary Information for

## Outdoor air pollution in India is not only an urban problem

A.R. Ravishankara<sup>1,2</sup>, Liji M. David<sup>1,2</sup>, Jeffrey R. Pierce<sup>2</sup>, and Chandra Venkataraman<sup>3</sup>

<sup>1</sup>Department of Chemistry, Colorado State University, Fort Collins, CO 80523, USA

<sup>2</sup>Department of Atmospheric Science, Colorado State University, Fort Collins, CO 80523, USA

<sup>3</sup>Department of Chemical Engineering, Indian Institute of Technology Bombay, Powai, Mumbai-400076, India

A.R. Ravishankara

Email: A.R.Ravishankara@colostate.edu

### This PDF file includes:

Supplementary text  
Figures S1 to S6  
Table T1  
SI References

### Supplementary Information Text

Figure S1 shows a map of India divided into six regions. Figure S2 shows the urban and non-urban classification based on: (a) VIIRS nighttime light; and (b) the combined data of census and Global Human Settlement Layer built-up over India. The census and Global Human Settlement Layer built-up data at 1 km grid is classified into 4 categories – urban agreement, urban people only, built-up land only, rural extent, and uninhabited areas (1, 2). The urban agreement and urban people only have been categorized as ‘urban’ and rural extent and uninhabited areas as ‘non-urban’ in Figure S2. Figure S3 shows the aerosol optical depth (AOD) (a measure relatable to the surface PM<sub>2.5</sub> levels, see **method**) obtained from three different satellites as a function of the month of the year for 2015. Irrespective of the satellite, the AOD is similar for urban and non-urban areas for each of the months of the year. The Moderate Resolution Imaging Spectroradiometer (MODIS) instrument on two different satellite buses sampling at different times of the day gives essentially the same AODs. The Multi-angle Imaging Spectroradiometer (MISR) instrument suggests lower AOD compared to the MODIS. These differences have been discussed elsewhere (3) as primarily due to differences in the algorithm used to retrieve aerosol products and the specific available data.

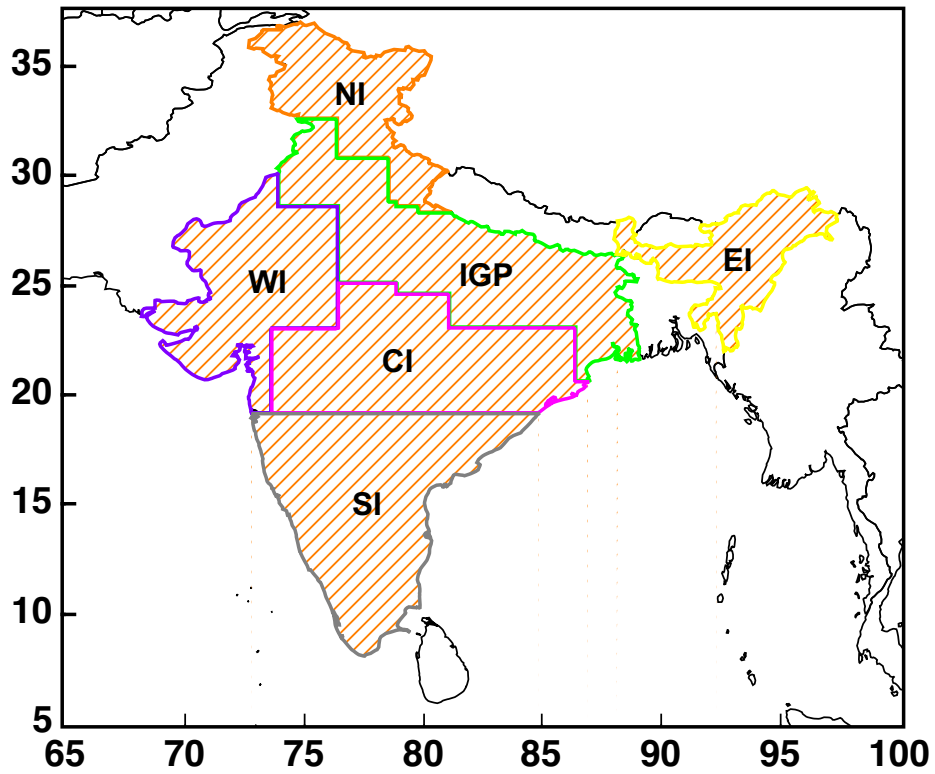

**Fig. S1.** A map of India divided into six regions based on meteorology and variation of aerosols (adapted from David et al.(4)). NI = Northern India; IGP = Indo-Gangetic Plain; EI = Eastern India; WI = Western India; CI = Central India; and SI = Southern India.

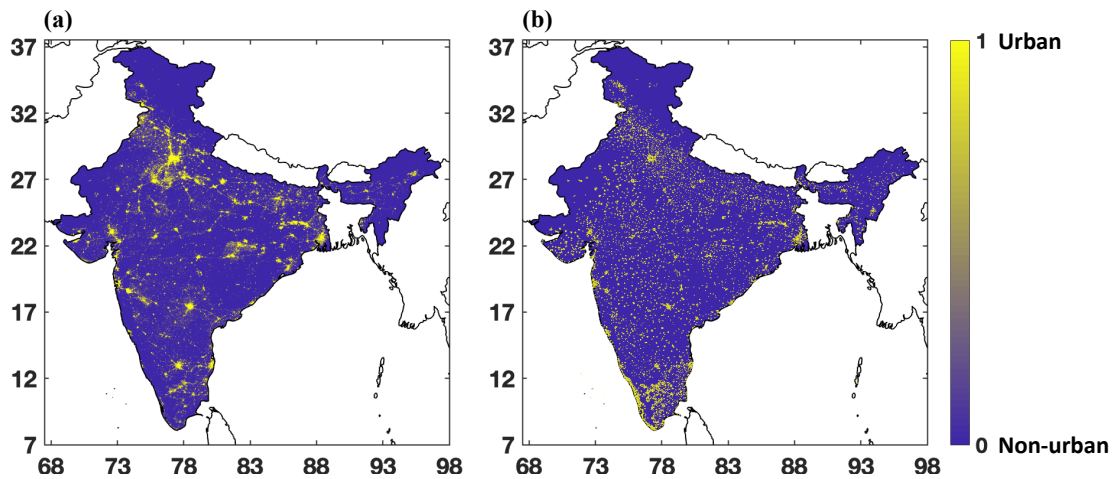

**Fig. S2.** The urban and non-urban classification based on (a) VIIRS nighttime light and (b) the combined data of census and Global Human Settlement Layer built-up data at ~1 km resolution over India.

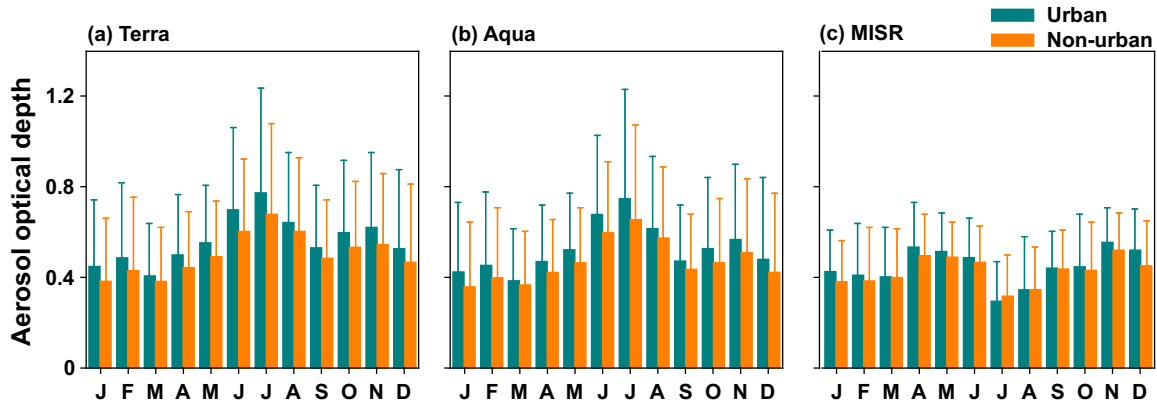

**Fig. S3.** Monthly variation in aerosol optical depth over urban and non-urban regions in India as observed by (a) Terra, (b) Aqua, and (c) MISR instruments for 2015.

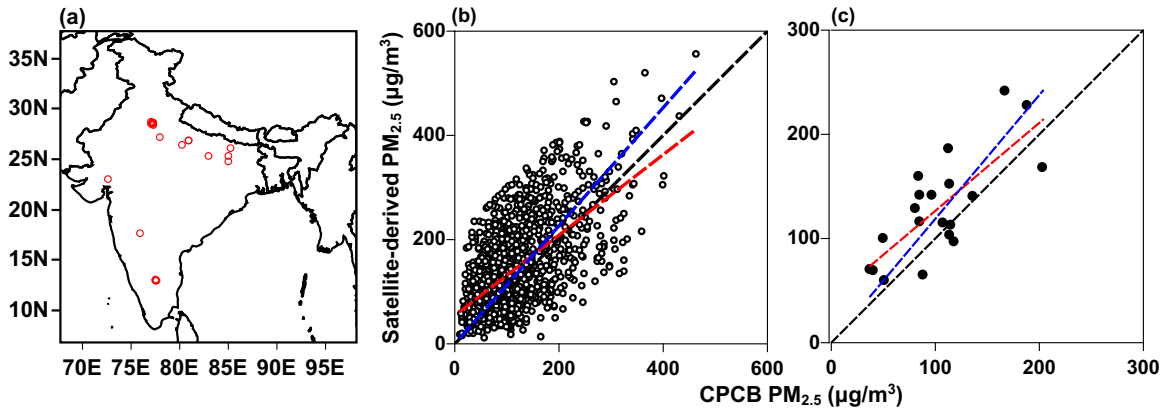

**Fig. S4.** (a) The location of the Central Pollution Control Board (CPCB) monitoring sites; (b) a comparison of the daily satellite-derived  $PM_{2.5}$  with the CPCB observations for 2015; and (c) a comparison of the annual satellite-derived  $PM_{2.5}$  with the CPCB observations for 2015. The linear regression line is shown in red. The regression line with zero intercept is shown in blue. The black dashed line corresponds to slope = 1.

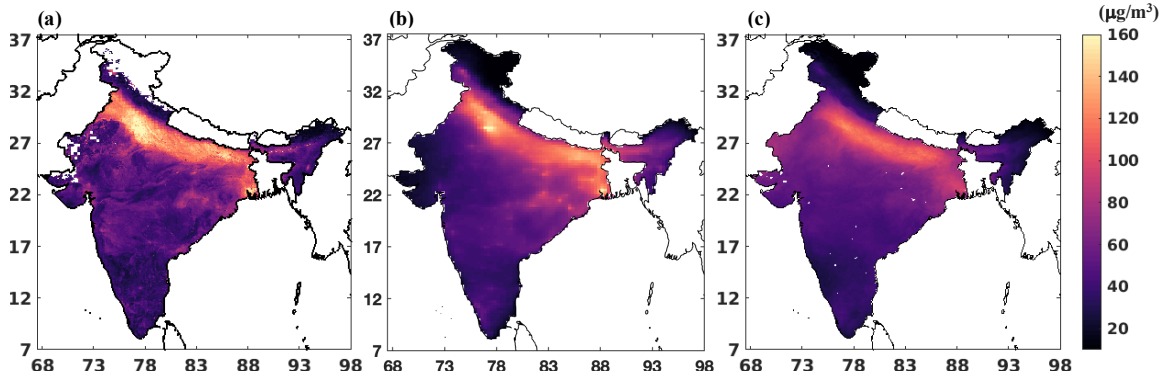

**Fig. S5.** Spatial variation in annual mean satellite-derived  $PM_{2.5}$  from (a) this work at  $4.63\text{ km}\times 4.63\text{ km}$ , (b) GEOS-Chem at  $0.25^\circ\times 0.3125^\circ$  resolution, and (c) Hammer et al. (5) at  $0.01^\circ\times 0.01^\circ$  resolution.

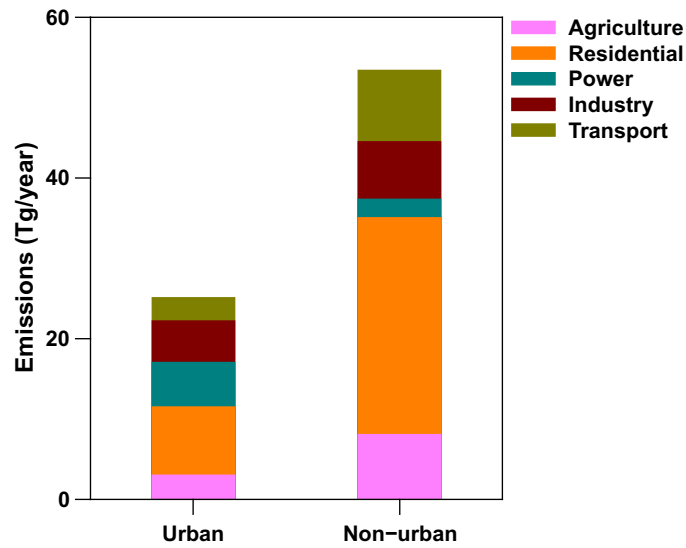

**Fig. S6.** The emissions in the urban and non-urban regions from agriculture, residential, power, industry, and transport sectors calculated from the emission inventories in the model. This shows that a large fraction of the non-urban regions is polluted to their own emissions.

**Table T1.** Studies on PM<sub>2.5</sub> concentrations in rural regions in India for the period 2010-2016.

| Location                        | Period of study | Mean PM <sub>2.5</sub> concentration (µg/m <sup>3</sup> ) | Reference |
|---------------------------------|-----------------|-----------------------------------------------------------|-----------|
| Patiala, Punjab                 | 10/2011-09/2012 | ~21-330 (daytime)<br>~28-400 (nighttime)                  | (6)       |
| Agra,<br>Uttar Pradesh          | 11/2010-02/2011 | 91.2 ± 17.3                                               | (7)       |
| Agra,<br>Uttar Pradesh          | 04/2010-06/2010 | 90.2 ± 7.21                                               | (8)       |
| Rajim, Chattisgarh              | 10/2011-11/2011 | 200 ± 127                                                 | (9)       |
| Ranga Reddy,<br>Telangana       | 06/2015-05/2016 | 30                                                        | (10)      |
| Mahabubnagar,<br>Andhra Pradesh | 07/2011-11/2011 | 50.0 ± 10.0                                               | (11)      |

**SI References**

1. D. Balk, *et al.*, Urbanization in India: Population and urban classification grids for 2011. *Data* **4**, 1–16 (2019).
2. D. Balk, *et al.*, Spatial Data from the 2011 India Census. Palisades, NY: NASA Socioeconomic Data and Applications Center (SEDAC) (2020) <https://doi.org/doi.org/10.7927/gya1-wp91> Accessed 22 July 2020.
3. R. A. Kahn, *et al.*, MISR aerosol product attributes and statistical comparisons with MODIS. *IEEE Trans. Geosci. Remote Sens.* **47**, 4095–4114 (2009).
4. L. M. David, *et al.*, Aerosol Optical Depth Over India. *J. Geophys. Res. Atmos.* **123**, 1–16 (2018).
5. M. S. Hammer, *et al.*, Global Estimates and Long-Term Trends of Fine Particulate Matter Concentrations (1998–2018). *Environ. Sci. Technol.* **54**, 7879–7890 (2020).
6. N. Rastogi, A. Singh, M. M. Sarin, D. Singh, Temporal variability of primary and secondary aerosols over northern India: Impact of biomass burning emissions. *Atmos. Environ.* **125**, 396–403 (2016).
7. T. Pachauri, A. Satsangi, V. Singla, A. Lakhani, K. Maharaj Kumari, Characteristics and sources of carbonaceous aerosols in PM<sub>2.5</sub> during wintertime in Agra, India. *Aerosol Air Qual. Res.* **13**, 977–991 (2013).
8. A. S. Pipal, A. Kulshrestha, A. Taneja, Characterization and morphological analysis of airborne PM<sub>2.5</sub> and PM<sub>10</sub> in Agra located in north central India. *Atmos. Environ.* **45**, 3621–3630 (2011).
9. J. Nirmalkar, D. K. Deshmukh, M. K. Deb, Y. I. Tsai, K. Sopajaree, Mass loading and episodic variation of molecular markers in PM<sub>2.5</sub> aerosols over a rural area in eastern central India. *Atmos. Environ.* **117**, 41–50 (2015).
10. M. K. Kumar, V. Sreekanth, M. Salmon, C. Tonne, J. D. Marshall, Use of spatiotemporal characteristics of ambient PM<sub>2.5</sub> in rural South India to infer local versus regional contributions. *Environ. Pollut.* **239**, 803–811 (2018).
11. D. S. Bisht, *et al.*, Aerosol characteristics at a rural station in southern peninsular India during CAIPEEX-IGOC: physical and chemical properties. *Environ. Sci. Pollut. Res.* **22**, 5293–5304 (2015).
